# Supplementary material
Source: HighWire-hosted journal article supplement (http://thorax.bmjjournals.com/highwire/filestream/174138/field_highwire_adjunct_files/0/Thorax_SupplementalTables.pdf)
Supplement: Thorax_SupplementalTables.pdf [file Thorax_SupplementalTables.pdf]

## ONLINE SUPPLEMENT ADDED INFORMATION

### METHODS (Additional description of dry air hyperventilation challenge)

Isocapnic dry air hyperventilation challenge (DACH) was performed after baseline spirometry at age 13 and 18 years. Dry air containing 5% CO<sub>2</sub> was breathed at a rate corresponding to resting FEV<sub>1</sub> x 26 (L/min) for four minutes. An adult size Hans-Rudolph two-way valve was used for the provocations to ensure that no flow limitation would occur. FEV<sub>1</sub> was measured in triplicate at baseline and in duplicate at 2, 5, and 10 minutes after challenge, and the highest value at each point in time was noted. The maximum fall in FEV<sub>1</sub>, from the baseline value, was calculated. After challenge 400 µg of salbutamol was inhaled, via a dry powder inhaler, (800 µg if fall in FEV<sub>1</sub> was ≥10%) and followed by spirometry (in triplicate) 15 minutes later.

Table E1. Background factors from age 1 to 18 in the RSV and control cohorts.

| Variable                      |        | RSV |    |    |    |    | Controls |    |    |    |    |
|-------------------------------|--------|-----|----|----|----|----|----------|----|----|----|----|
| Age, yr                       |        | 1   | 3  | 7  | 13 | 18 | 1        | 3  | 7  | 13 | 18 |
| Family history                |        |     |    |    |    |    |          |    |    |    |    |
| Family history of Atopy       | Total  |     | 57 | 70 | 74 | 74 |          | 56 | 65 | 74 | 74 |
|                               | Parent |     | 49 | 62 | 61 | 65 |          | 46 | 48 | 54 | 56 |
| Family history of Asthma      | Total  |     | 23 | 45 | 50 | 52 |          | 24 | 29 | 35 | 35 |
|                               | Parent |     | 21 | 34 | 37 | 39 |          | 18 | 20 | 27 | 28 |
| Current smoking in family     |        | 45  | 45 | 43 | 35 | 42 | 45       | 45 | 39 | 42 | 43 |
| Own smoking                   |        |     |    |    |    | 22 |          |    |    |    | 15 |
| Current indoor furred animals |        | 30  | 26 | 45 | 63 | 52 | 38       | 39 | 44 | 74 | 61 |

Data displayed as percentage (%)

**Table E2.** Proportion of tested subjects in the RSV and control cohorts with positive skin prick tests, Phadiatop® tests or raised specific serum IgE antibodies to inhalant allergens at age 18 years. HDM = house dust mite.

|                        | RSV<br>(n=46) | Control<br>(n=92) | p-value |
|------------------------|---------------|-------------------|---------|
| <i>Skin prick test</i> |               |                   |         |
| Any pollen             | 16/41 (39%)   | 22/85 (26%)       | 0.194   |
| Any animal dander      | 13/40 (33%)   | 9/85 (11%)        | 0.006   |
| Any HDM                | 10/40 (25%)   | 9/85 (11%)        | 0.068   |
| Any perennial          | 16/40 (40%)   | 12/85 (14%)       | 0.003   |
| Any positive test      | 19/41 (46%)   | 26/85 (31%)       | 0.126   |
| <i>Blood samples</i>   |               |                   |         |
| Phadiatop® test        | 23/41 (56%)   | 24/85 (28%)       | 0.005   |

**Table E3.** Airway function and inflammatory markers in subjects with vs without current asthma/RW at age 18 years.

|                                               | Current<br>asthma/RW<br>(n=26) | No current<br>asthma/RW<br>(n=112) | 95% CI for difference |
|-----------------------------------------------|--------------------------------|------------------------------------|-----------------------|
| <i>Resting</i>                                |                                |                                    |                       |
| FEV <sub>1</sub> (z-score)                    | -0.43 (0.87)                   | 0.09 (1.06)                        | 0.07; 0.96 *          |
| FEV <sub>1</sub> /FVC (z-score)               | -0.59 (1.09)                   | -0.20 (0.98)                       | -0.04; 0.83           |
| FEF <sub>25-75</sub> (z-score)                | -0.64 (0.84)                   | -0.13 (0.84)                       | 0.14; 0.87 **         |
| LCI                                           | 6.88 (0.53)                    | 6.53 (0.41)                        | -0.54; -0.16 ***      |
| <i>Challenge (DACH)</i>                       |                                |                                    |                       |
| Fall in FEV <sub>1</sub> (%)                  | 8.5 (0.0; 42.8)                | 3.1 (0.0; 22.1)                    | 2.5; 8.7 ***          |
| <i>Post-bronchodilation</i>                   |                                |                                    |                       |
| Rise in FEV <sub>1</sub> (%)                  | 5.6 (0.0; 10.2)                | 3.7 (0.0; 10.4)                    | 0.0; 3.1              |
| FEV1 (z-score)                                | -0.05 (0.88)                   | 0.40 (1.08)                        | -0.01; 0.88           |
| FEV1/FVC (z-score)                            | -0.01 (0.94)                   | 0.34 (0.94)                        | -0.05; 0.76           |
| FEF <sub>25-75</sub> (z-score)                | -0.05 (0.82)                   | 0.33 (0.82)                        | 0.02; 0.73 *          |
| <i>Inflammatory markers</i>                   |                                |                                    |                       |
| FENO (ppb)                                    | 18 (7; 84)                     | 13 (5; 74)                         | 1; 5 **               |
| Blood eosinophil counts (x10 <sup>9</sup> /L) | 0.24 (0.04; 0.57)              | 0.14 (0.01; 0.79)                  | 0.04; 0.15 **         |

Definition of abbreviations: LCI= lung clearance index; FENO = fraction exhaled nitric oxide; ppb = parts per billion; DACH = Isocapnic dry air hyperventilation challenge. Data are displayed as mean (SD) or median (range). For normally distributed data differences between the two groups are shown with 95% CI for the mean values and for non-normally distributed data as the 95% CI for the medians. \* p<0.05, \*\* p<0.01, \*\*\* p<0.001.

**Table E4.** Airway function and inflammatory markers RW at age 18 years in RSV subjects with vs without current asthma/RW and in control subjects with vs without current asthma/RW.

|                                         | RSV                  |                         |                          | Controls            |                         |                          |
|-----------------------------------------|----------------------|-------------------------|--------------------------|---------------------|-------------------------|--------------------------|
|                                         | Asthma/RW<br>(N= 18) | No asthma/RW<br>(N= 24) | 95% CI for<br>difference | Asthma/RW<br>(N= 8) | No asthma/RW<br>(N= 78) | 95% CI for<br>difference |
| <i>Resting</i>                          |                      |                         |                          |                     |                         |                          |
| FEV <sub>1</sub> (z-score)              | -0.64 (0.85)         | 0.00 (0.91)             | 0.09; 1.20 *             | 0.05 (0.77)         | 0.11 (1.11)             | -0.74; 0.86              |
| FEV <sub>1</sub> /FVC (z-score)         | -0.89 (0.82)         | -0.53 (0.86)            | -0.17; 0.90              | 0.08 (1.37)         | -0.10 (1.00)            | -0.94; 0.59              |
| FEF <sub>25-75</sub> (z-score)          | -0.89 (0.71)         | -0.38 (0.75)            | 0.04; 0.97 *             | -0.06 (0.86)        | -0.05 (0.85)            | -0.62; 0.64              |
| LCI                                     | 6.88 (0.63)          | 6.44 (0.31)             | -0.74; -0.14<br>**       | 6.89 (0.25)         | 6.56 (0.43)             | -0.64; -0.03 *           |
| <i>Challenge (DACH)</i>                 |                      |                         |                          |                     |                         |                          |
| Fall in FEV <sub>1</sub> (%)            | 8.5 (0.0; 37.8)      | 3.6 (0.0; 9.3)          | 1.0; 12.8 **             | 7.5 (0.3; 42.8)     | 3.1 (0.0; 22.1)         | 0.5; 8.8                 |
| <i>Post broncho-dilation</i>            |                      |                         |                          |                     |                         |                          |
| Rise in FEV <sub>1</sub> (%)            | 6.5 (0.0; 10.2)      | 5.4 (0.0; 10.5)         | -1.1; 3.4                | 2.5 (0.0; 9.9)      | 3.1 (0.0; 10.4)         | -2.9; 2.3                |
| FEV <sub>1</sub> (z-score)              | -0.18(0.79)          | 0.41 (0.81)             | 0.09; 1.10 *             | 0.25 (1.05)         | 0.39 (1.15)             | -0.71; 0.99              |
| FEV <sub>1</sub> /FVC (z-score)         | -0.23 (0.83)         | 0.11 (0.90)             | -0.21; 0.88              | 0.48 (1.06)         | 0.41 (0.95)             | -0.77; 0.65              |
| FEF <sub>25-75</sub> (z-score)          | -0.29 (0.76)         | 0.19 (0.74)             | 0.10; 0.95 *             | 0.48 (0.72)         | 0.37 (0.84)             | -0.73; 0.50              |
| <i>Inflammatory markers</i>             |                      |                         |                          |                     |                         |                          |
| FENO (ppb)                              | 22 (6; 84)           | 13 (6; 54)              | 1; 25 *                  | 15 (7; 51)          | 12 (5; 74)              | -3; 17                   |
| Blood eosinophils (x10 <sup>9</sup> /L) | 0.33 (0.06; 0.57)    | 0.16 (0.04; 0.37)       | 0.04; 0.23**             | 0.16 (0.04; 0.31)   | 0.14 (0.01; 0.79)       | -0.04; 0.08              |

Definition of abbreviations: LCI= lung clearance index; FENO = fraction exhaled nitric oxide; ppb = parts per billion; DACH = Isocapnic dry air hyperventilation challenge. Data are displayed as mean (SD) or median (range). For normally distributed data differences between the two groups are shown with 95% CI for the mean values and for non-normally distributed data as the 95% CI for the medians. \* p<0.05, \*\* p<0.01.

**Table E5.** Associations between bronchial hyperresponsiveness (maximum % fall in FEV<sub>1</sub> after dry air hyperventilation challenge) and inflammatory variables and resting airway function assessed by regression analysis in the RSV cohort.

| Group assessed | N  | Dependent variable             | Independent variable(s)         | R <sup>2</sup> adj | p-value  | Beta value(s)                         |
|----------------|----|--------------------------------|---------------------------------|--------------------|----------|---------------------------------------|
| RSV cohort     | 39 | Max % fall in FEV <sub>1</sub> | Eosinophil count                | 0.123              | 0.0106   | 0.382                                 |
| RSV cohort     | 41 | Max % fall in FEV <sub>1</sub> | FENO                            | 0.260              | 0.0004   | 0.528                                 |
| RSV cohort     | 40 | Max % fall in FEV <sub>1</sub> | LCI                             | 0.436              | 0.000002 | 0.672                                 |
| RSV cohort     | 41 | Max % fall in FEV <sub>1</sub> | FEV <sub>1</sub> (z-score)      | 0.021              | 0.665    | -0.007                                |
| RSV cohort     | 38 | Max % fall in FEV <sub>1</sub> | Eosinophil count<br>FENO<br>LCI | 0.489              | 0.000009 | 0.091 (n.s.)<br>0.247 (n.s.)<br>0.540 |

**Table E6.** Results from conditional (case- control) logistic regression tests with one index subject matched to two controls of the same sex from the same health care centre, and allocation (RSV or control), sex, parental smoking in the first year of life, domestic pets in the first year of life, own smoking at age 18, and a history of physician diagnosed parental asthma at the last follow-up as independent factors.

| Dependent variable  | Significant independent variables | p-value | OR   | 95% CI      |
|---------------------|-----------------------------------|---------|------|-------------|
| Asthma/RW at age 18 | RSV allocation                    | 0.004   | 3.41 | 1.47; 7.95  |
| Asthma at age 18    | RSV allocation                    | 0.002   | 5.74 | 1.87; 17.64 |
| ARC at age 18       | RSV allocation                    | 0.014   | 2.54 | 1.21; 5.36  |

:
